# Supplementary material
Source: Springer Nature journal article supplement (https://www.springermedizin.de/resource/supplementary/12955_2008_478_MOESM4_ESM.pdf/9560548)
Supplement: MOESM4 [file 9560548]

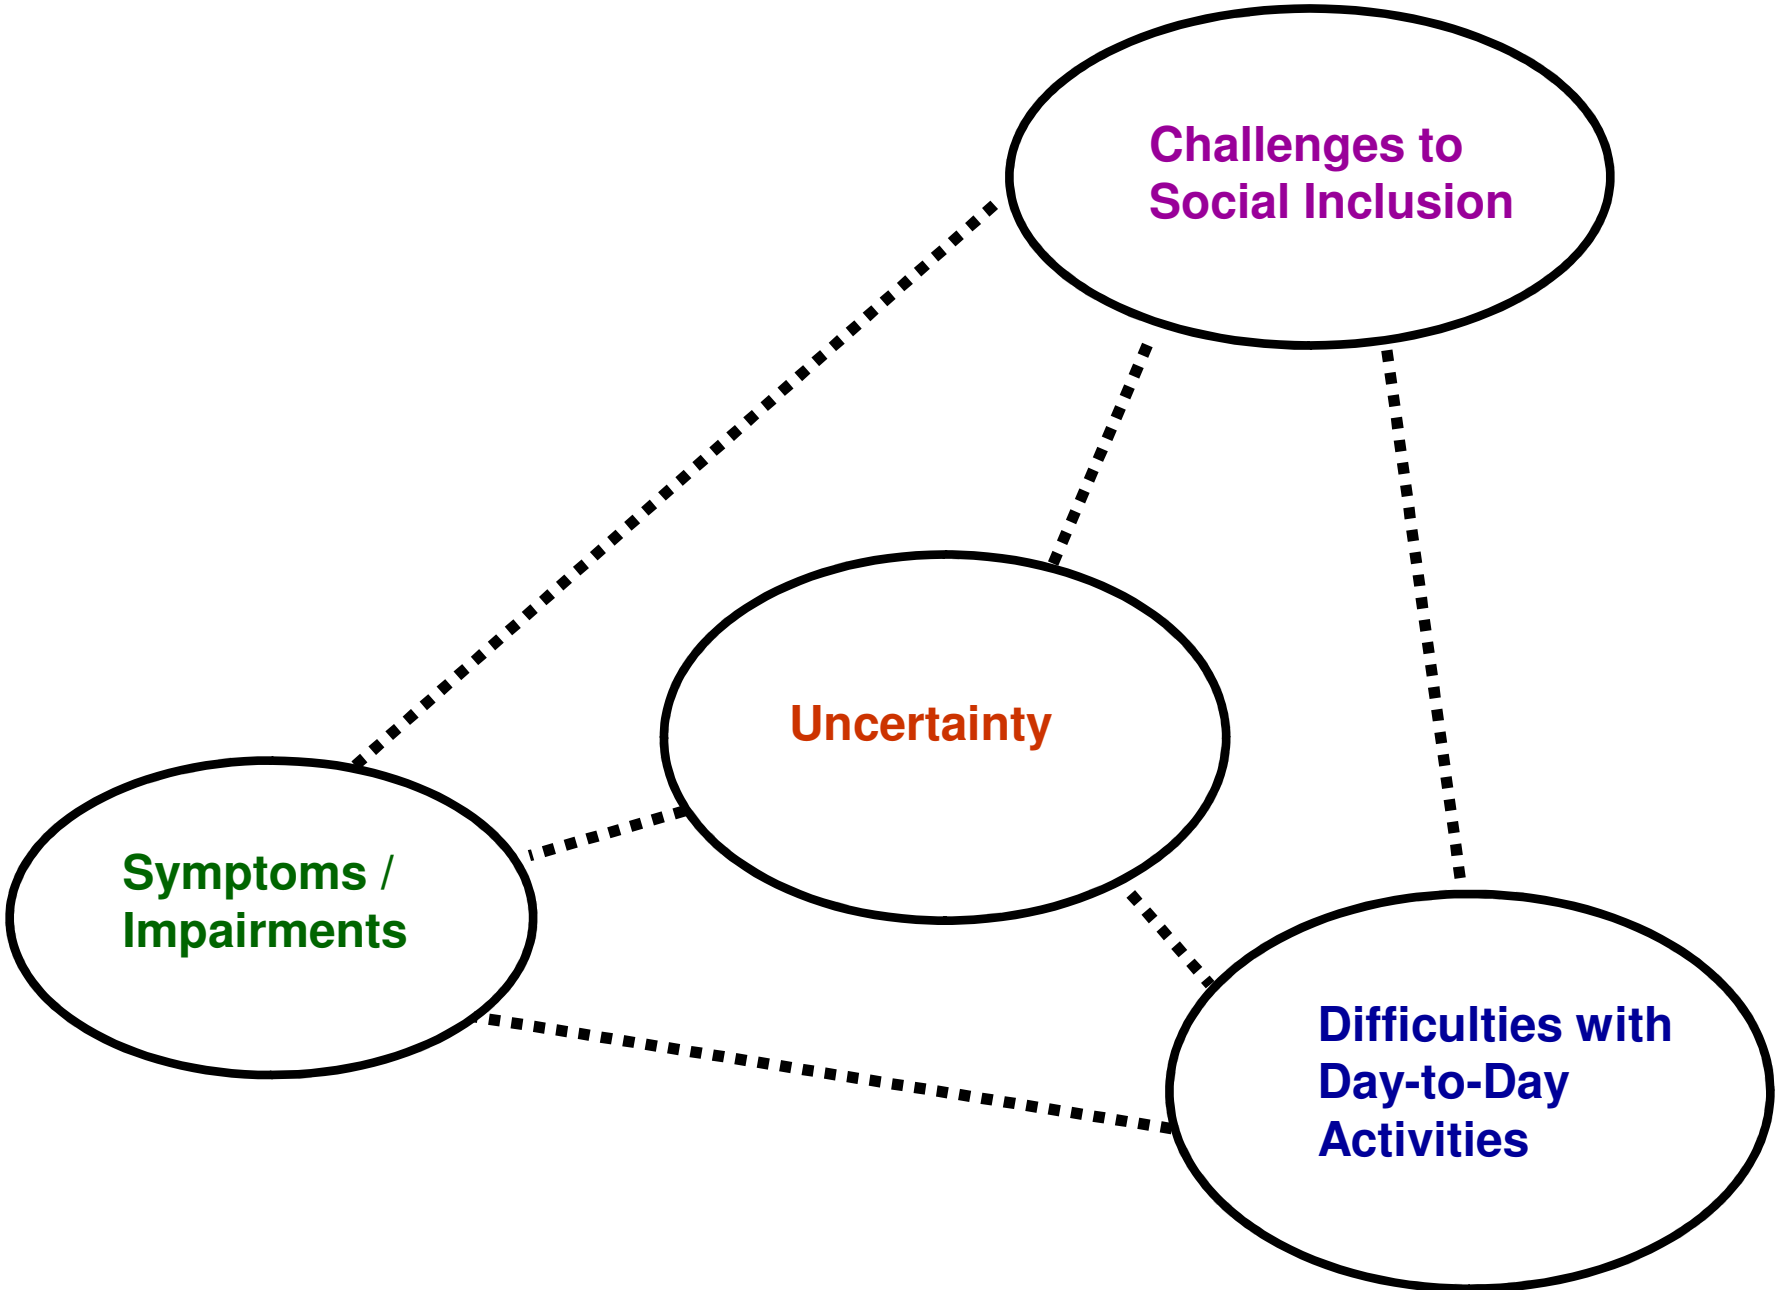

**Challenges to  
Social Inclusion**

**Uncertainty**

**Symptoms /  
Impairments**

**Difficulties with  
Day-to-Day  
Activities**
